# Supplementary material for: Acute Alcohol Effects on Response Inhibition Depend on Response Automatization, but not on GABA or Glutamate Levels in the ACC and Striatum
Source: J Clin Med. 2020 Feb 10;9(2):481. doi: 10.3390/jcm9020481 (PMC7073826; doi:10.3390/jcm9020481)
Supplement: Supplementary file 1 [file jcm-09-00481-s001.xlsx]

## Sheet: Tabelle1
Please enter values
Sex (f/m)	m
height in cm	180
weight in kg	80
age in years	25
Vol % of alcoholic beverage	40
only change max. BAC (not realistic BAC!)
max. BAC	1.5
realistic BAC on an empty stomach (assumed resorption deficit of 20%) The intoxication peak will be reached about 60 min. after and of consumption (if consumed within 30 min, or less)	1.2
Your results (please don't manipulate)
estimated total body water in l	46.296
required alcohol in gr	91.5793
ml of alcoholic beverage needed (consumption within 30 minutes)	286.185
